# Supplementary material for: Plasma metanephrines and prospective prediction of tumor location, size and mutation type in patients with pheochromocytoma and paraganglioma
Source: publisher site journal article supplement (doi:10.1515/cclm-2020-0904), 2020-10-01
Supplement: Supplementary file 1 [file j_cclm-2020-0904_suppl.docx]

**Plasma metanephrines and prospective prediction of tumor location, size and mutation type in patients with pheochromocytoma and paraganglioma**

Graeme Eisenhofer,1,2 Timo Deutschbein,3 Georgiana Constantinescu,2 Katharina Langton,2 Christina Pamporaki,2 Bruna Calsina,4 Maria Monteagudo,4 Mirko Peitzsch,1 Stephanie Fliedner,5 Henri JLM Timmers,6 Nicole Bechmann,1,7 Maria Fankhauser,8 Svenja Nölting,8 Felix Beuschlein,8,9 Anthony Stell,10 Martin Fassnacht,3,11 Aleksander Prejbisz,12 Jacques WM Lenders2,6 and Mercedes Robledo4

1Institute of Clinical Chemistry and Laboratory Medicine and 2Department of Medicine III, University Hospital Carl Gustav Carus, Technische Universität Dresden, Germany; 3Department of Internal Medicine I, Division of Endocrinology and Diabetes, University Hospital, University of Würzburg, Würzburg, Germany; 4Hereditary Endocrine Cancer Group, Spanish National Cancer Research Centre and Centro de Investigación Biomédica en Red de Enfermedades Raras, Madrid, Spain; 5First Department of Medicine, University Medical Center Schleswig-Holstein, Lübeck, Germany; 8Department of Internal Medicine, Radboud University Medical Centre, Nijmegen, The Netherlands; 7German Institute of Human Nutrition Potsdam-Rehbruecke, Department of Experimental Diabetology, Nuthetal, Germany; 8Medizinische Klinik und Poliklinik IV, Klinikum der Ludwig-Maximilians-Universität München, Munich, Germany; 9Department of Endocrinology, Diabetology and Clinical Nutrition, UniviersitätsSpital Zürich, Zurich, Switzerland; 10Department of Computing and Information, University of Melbourne, Melbourne Australia; 11Central laboratory, University Hospital Würzburg, Würzburg, Germany and 12Department of Hypertension, Institute of Cardiology, Warsaw, Poland.

___________________________________________________________________________

**Table of contents**

**Description Page no**

Background to the supplemental appendix………………………………………………………….…………. 1

Overview of the PMT study………………………………………………………………………………….… 2

History and study infrastructure……………………………………...…….………………...….….….…. 2

Prospective study design……………………………………………………...………………….………... 2

Study objectives…………………………………………………………..…...………………….………... 2

Additional PMT study-related projects……………………………………………………...…………………. 3

PMT study-derived original published reports…………………………………………….…………..…….… 4

Supplemental results…………………………………………………………………………………………… 6

Supplemental table 1……………………………………………………………………………………….. 6

Supplemental table 2……………………………………………………………………………………….. 6 Supplemental figure 1……………………………………………………………………………………... 7

Supplemental table 3……………………………………………………………………………………….. 8

**Background to the supplemental material**

The supplemental material outlined here was produced in response to prior reviews elsewhere for which there were requests to clarify clinical relevance, outline how the present study differs from previously published work and additionally clarify overlap in the use of patient specimens and data in previous publications. For this the supplemental appendix first provides background to the prospective monoamine producing tumor (PMT) study, including study design followed by an outline of study objectives and projects and finally an overview of original publications that have arisen from the study. For context and additional transparency the comments from prior reviews elsewhere are included along with responses to all comments.

For additional information about PMT study patient flow through the various phases of the study, as well as other methodological details not covered in this supplement, the reader is referred to the supplemental appendix of the report that addresses the primary objective of the PMT study; that report is available by open access at the uniform resource locator address below.

<https://academic.oup.com/clinchem/article/64/11/1646/5608639>

**Overview of the PMT study**

**History and study infrastructure**

The Prospective Monoamine Tumor (PMT) study was initially conceived in mid 2009 by Drs Jacques Lenders and Graeme Eisenhofer. A final draft of the protocol was completed and submitted to the Dresden Ethics Committee in May 2010. After further revision and submission, the protocol was approved later in July 2010. Thereafter, involvement was obtained from five other study centers, including three in Germany (Munich, Würzburg, Lübeck, headed respectively by Drs Felix Beuschlein, Martin Fassnacht and Stephanie Fliedner) and one each in the Netherlands (Nijmegen, headed by Dr. Jacques Lenders with Dr. Henri Timmers) and Poland (Warsaw, headed by Dr. Alek Prejbisz with Dr. Andrzej Januszewicz ). At the same time an on line data management system within a virtual research environment (VRE) was established with the support of Drs Richard Sinnottt and Anthony Stell, who at that time were based in Glasgow, Scotland, before moving to Melbourne, Australia. The web-based VRE included electronic case report forms (eCRFs) with restricted access. These were accessed via a website entry portal (<https://pmt-study.pressor.org/>), also available to the general public where all relevant study documents may be found and downloaded as PDFs. These include an overview of the PMT study, the Dresden version of the study protocol, intellectual property guidelines and standard operating procedures (SOPs) for all aspects of the study protocol from patient recruitment, to collections of specimens and data as well as clinical procedures.

**Prospective study design**

Prospective studies, such as the PMT study, by definition involve a study design in which collections of patient samples and data occur at time points of first availability only after recruitment of patients into study protocols. This design differs from retrospective designs in which patient data and specimens have been collected before enrolment of patients into clinical protocols or registries. Prospective study designs are labor intensive, time consuming and expensive, but have the advantage over retrospective designs of providing for more rigorous collections and interpretations of data according to predefined criteria and SOPs. This provides for more reliable and accurate collections of data than from retrospective studies, with additional advantages of better enabling improved freedom from bias and confounding influences according to defined study objectives and specified outcome parameters.

From initial study formulation in 2009 and enrolment of first patients at Dresden late in 2010 to recruitment of over 2,200 patients in 2018 and ongoing further patient recruitment and follow-up, the PMT study represented a major investment of time and effort. This involved not only personnel at the six recruitment centers, but also investigators involved in data management and others such as Dr. Mercedes Robledo and her team at Madrid who were instrumental to the molecular genetics analyses. With recognition of these time demands, the PMT study was formulated with not only a single main objective, but also multiple secondary objectives. This facilitated maximal use of the considerable amounts of data collected under the protocol for numerous published advances in the field. Additionally, study investigators were provided with opportunities to build upon already defined study objectives during protocol development as well as during the early stages of protocol implementation. Thereafter there were additional opportunities to use data as part of retrospective analyses so long as those analyses did not conflict with predefined objectives. These multiple facets to the study protocol were considered of paramount importance to maintaining engagement and involvement of the many investigators who contributed to the PMT study. This was also crucial to involvement of the many younger investigators, clinician scientists and students who were instrumental to patient recruitment and data collection, and who were thereby provided with opportunities to compile published reports.

**Study objectives**

The overall goal of the PMT study, as defined in the study protocol, was to identify new and improved biomarkers and establish the biochemical and molecular basis for variations in the clinical presentation of patients with monoamine-producing tumors, including pheochromocytomas and paragangliomas (PPGLs).

The primary objective of the protocol was to compare the utility of plasma and urinary free metanephrines with urinary deconjugated metanephrines as initial tests for diagnosis of PPGLs. There were six other stated secondary objectives in the original version of the study protocol. The presently described manuscript is based on the second objective. As outlined in the methods section of the manuscript, the present report does not include prospective predictions of metastatic disease, which is the planned subject of another report yet to be compiled.

- Prospectively establish an effective and efficient strategy for follow-up biochemical testing to distinguish true-positive from false-positive elevations of plasma or urinary metanephrines in patients with suspected catecholamine-producing PPGLs.
- Characterize the biochemical signatures of different types of catecholamine-producing PPGLs and prospectively determine whether this information can be used to predict tumor burden, the presence or subsequent occurrence of malignant disease and the relative likelihood of specific mutations as a cost-effective and efficient guide to genotyping.
- Establish the relationships between the molecular, biochemical and secretory phenotypes and the cardiovascular and metabolic complications of catecholamine-producing PPGLs.
- Utilize mass spectrophotometric (MS) based metabolomic profiling to characterize the neurochemical profiles and bioenergetic signatures of different groups of hereditary PPGLs and any relationship of these profiles and signatures to tumor aggressiveness and malignancy.
- Extend HPLC- and MS-based monoamine metabolomic profiling to GEP tumors (including carcinoids) with the aim in a pilot study of identifying a panel of novel tumor biomarkers that can be compared for diagnostic efficacy against currently available routine biochemical tests for these tumors (e.g., 24-hour urinary 5-HIAA and serum CgA).
- Establish whether miRNA profiling of serum samples may provide novel biomarkers of disease in patients with PPGLs and GEP tumors. In particular, comparisons with well-established and validated biochemical tests offer the advantage of a “gold standard” for validation of the miRNA-profiles of the tumors.

**Additional PMT study-based projects**

In addition to the above pre-defined objectives, further studies were defined according to additional objectives or questions as outlined below. Most but not all involved retrospective analyses that took advantage of PMT-derived data.

- Impacts of seated versus supine sampling on use of plasma free metanephrines for diagnosis of pheochromocytoma
- Measurements of plasma metanephrines by immunoassay vs liquid chromatography with tandem mass spectrometry for diagnosis of pheochromocytoma.
- Characteristics of pediatric vs adult pheochromocytomas and paragangliomas.
- SDHB mutation testing in adrenergic metastatic phaeochromocytoma
- Krebs cycle metabolite profiling for identification and stratification of pheochromocytomas/paragangliomas due to succinate dehydrogenase deficiency
- Adrenomedullary function, obesity and permissive influences of catecholamines on body mass in patients with chromaffin cell tumours
- Prospective evaluation of incidentally discovered pheochromocytoma/paraganglioma
- Reference intervals for LC-MS/MS measurements of plasma free, urinary free and acid-hydrolyzed deconjugated O-methylated metabolites of catecholamines
- Impact of 123I-MIBG scintigraphy on clinical decision making in patients with pheochromocytoma and paraganglioma
- How do disease phenotypes differ among patients with PPGL according to clinical suspicion of the disease. Can this information be used to stratify patients according to risk of disease?
- Metastatic pheochromocytoma and paraganglioma in patients with SDHD mutations
- Overnight urinary free metanephrines for improved biochemical diagnosis of pheochromocytoma
- The clonidine suppression test for diagnosis of pheochromocytoma in patients with borderline elevations of plasma free normetanephrine
- A prospective head and neck paraganglioma study: novel diagnostic markers for identification and stratification of tumors
- Determinants of cardiovascular manifestations of pheochromocytoma and paraganglioma
- Targeted plasma metabolomics profiling in pheochromocytoma and paraganglioma
- Untargeted plasma metabolomics profiling in pheochromocytoma and paraganglioma
- Untargeted tumor tissue metabolomics profiling of pheochromocytomas and paragangliomas

**PMT study-derived published original reports**

As a consequence of the many objectives and projects outlined above, data from the PMT study has contributed to 26 original reports published between 2013 and 2020 [1-26]. There is some overlap among reports in use of data, including 13 reports that have reported mass spectrometric-based measurements of plasma and urinary catecholamine metabolites that were central to the PMT study [3,7-9,11,13-15,20,21,24-26]. A few reports have also included results of genetic tests, including one report involving comparisons of presentations of pediatric with adult PPGLs where genotype was linked to biochemical phenotype [15]. Nevertheless, that report did not address the objective of the present manuscript and there was no data in that report to establish utility of plasma free metanephrines and methoxytyramine for predicting underlying mutations, tumor location or size. Similarly all reports had distinctly different objectives and involved a focus not covered in reports published elsewhere. Furthermore all effort has been made to avoid presentation of duplicate or redundant material and in no report is that material utilized to address the same or similar questions of other reports.

1. Wallace PW, Conrad C, Bruckmann S, Pang Y, Caleiras E, Murakami M, et al. Metabolomics, machine learning and immunohistochemistry to predict succinate dehydrogenase mutational status in phaeochromocytomas and paragangliomas. J Pathol 2020 doi:10.1002/path.5472.

2. Gosk-Przybylek M, Doroszko A, Dobrowolski P, Warchol-Celinska E, Harazny J, Binczyk E, et al. Retinal arterial remodeling in patients with pheochromocytoma or paraganglioma and its reversibility following surgical treatment. J Hypertens 2020 doi: 10.1097/HJH.0000000000002420.

3. Peitzsch M, Kaden D, Pamporaki C, Langton K, Constantinescu G, Conrad C, et al. Overnight/first-morning urine free metanephrines and methoxytyramine for diagnosis of pheochromocytoma and paraganglioma: is this an option? Eur J Endocrinol 2020;182:499-509.

4. Erlic Z, Kurlbaum M, Deutschbein T, Nolting S, Prejbisz A, Timmers H, et al. Metabolic impact of pheochromocytoma/paraganglioma: targeted metabolomics in patients before and after tumor removal. Eur J Endocrinol 2019;181:647-657.

5. Geroula A, Deutschbein T, Langton K, Masjkur J, Pamporaki C, Peitzsch M, et al. Pheochromocytoma and paraganglioma: clinical feature-based disease probability in relation to catecholamine biochemistry and reason for disease suspicion. Eur J Endocrinol 2019;181:409-420.

6. Rao D, van Berkel A, Piscaer I, Young WF, Gruber L, Deutschbein T, et al. Impact of 123 I-MIBG scintigraphy on clinical decision making in pheochromocytoma and paraganglioma. J Clin Endocrinol Metab 2019.

7. Rogowski-Lehmann N, Geroula A, Prejbisz A, Timmers H, Megerle F, Robledo M, et al. Missed clinical clues in patients with pheochromocytoma/paraganglioma discovered by imaging. Endocr Connect 2018.

8. Eisenhofer G, Prejbisz A, Peitzsch M, Pamporaki C, Masjkur J, Rogowski-Lehmann N, et al. Biochemical diagnosis of chromaffin cell tumors in patients at high and low risk of disease: Plasma versus urinary free or deconjugated O-methylated catecholamine metabolites. Clin Chem 2018;64:1646-1656.

9. Eisenhofer G, Peitzsch M, Kaden D, Langton K, Mangelis A, Pamporaki C, et al. Reference intervals for LC-MS/MS measurements of plasma free, urinary free and urinary acid-hydrolyzed deconjugated normetanephrine, metanephrine and methoxytyramine. Clin Chim Acta 2018;490:46-54.

10. Richter S, Gieldon L, Pang Y, Peitzsch M, Huynh T, Leton R, et al. Metabolome-guided genomics to identify pathogenic variants in isocitrate dehydrogenase, fumarate hydratase, and succinate dehydrogenase genes in pheochromocytoma and paraganglioma. Genet Med 2018.

11. An Y, Reimann M, Masjkur J, Langton K, Peitzsch M, Deutschbein T, et al. Adrenomedullary function, obesity and permissive influences of catecholamines on body mass in patients with chromaffin cell tumours. Int J Obes (Lond) 2019;43:263-275.

12. Gieldon L, Masjkur JR, Richter S, Darr R, Lahera M, Aust D, et al. Next-generation panel sequencing identifies NF1 germline mutations in three patients with pheochromocytoma but no clinical diagnosis of neurofibromatosis type 1. Eur J Endocrinol 2018;178:K1-K9.

13. Langton K, Gruber M, Masjkur J, Steenblock C, Peitzsch M, Meinel J, et al. Hypertensive crisis in pregnancy due to a metamorphosing pheochromocytoma with postdelivery Cushing's syndrome. Gynecol Endocrinol 2018;34:20-24.

14. Rao D, Peitzsch M, Prejbisz A, Hanus K, Fassnacht M, Beuschlein F, et al. Plasma methoxytyramine: clinical utility with metanephrines for diagnosis of pheochromocytoma and paraganglioma. Eur J Endocrinol 2017;177:103-113.

15. Pamporaki C, Hamplova B, Peitzsch M, Prejbisz A, Beuschlein F, Timmers HJ, et al. Characteristics of pediatric vs adult pheochromocytomas and paragangliomas. J Clin Endocrinol Metab 2017.

16. Maison N, Korpershoek E, Eisenhofer G, Robledo M, de Krijger R, Beuschlein F. Somatic RET mutation in a patient with pigmented adrenal pheochromocytoma. Endocrinol Diabetes Metab Case Rep 2016;2016:150117.

17. Richter S, Klink B, Nacke B, de Cubas AA, Mangelis A, Rapizzi E, et al. Epigenetic mutation of the succinate dehydrogenase C promoter in a patient with two paragangliomas. J Clin Endocrinol Metab 2016;101:359-363.

18. Rao JU, Engelke UF, Sweep FC, Pacak K, Kusters B, Goudswaard AG, et al. Genotype-specific differences in the tumor metabolite profile of pheochromocytoma and paraganglioma using untargeted and targeted metabolomics. J Clin Endocrinol Metab 2015;100:E214-222.

19. Papathomas TG, Oudijk L, Persu A, Gill AJ, van Nederveen F, Tischler AS, et al. SDHB/SDHA immunohistochemistry in pheochromocytomas and paragangliomas: a multicenter interobserver variation analysis using virtual microscopy: a Multinational Study of the European Network for the Study of Adrenal Tumors (ENS@T). Mod Pathol 2015;28:807-821.

20. Weismann D, Peitzsch M, Raida A, Prejbisz A, Gosk M, Riester A, et al. Measurements of plasma metanephrines by immunoassay vs liquid chromatography with tandem mass spectrometry for diagnosis of pheochromocytoma. Eur J Endocrinol 2015;172:251-260.

21. Sue M, Martucci V, Frey F, Lenders JM, Timmers HJ, Peczkowska M, et al. Lack of utility of SDHB mutation testing in adrenergic metastatic phaeochromocytoma. Eur J Endocrinol 2015;172:89-95.

22. Richter S, Peitzsch M, Rapizzi E, Lenders JW, Qin N, de Cubas AA, et al. Krebs cycle metabolite profiling for identification and stratification of pheochromocytomas/paragangliomas due to succinate dehydrogenase deficiency. J Clin Endocrinol Metab 2014;99:3903-3911.

23. Qin N, de Cubas AA, Garcia-Martin R, Richter S, Peitzsch M, Menschikowski M, et al. Opposing effects of HIF1alpha and HIF2alpha on chromaffin cell phenotypic features and tumor cell proliferation: Insights from MYC-associated factor X. Int J Cancer 2014;135:2054-2064.

24. Darr R, Pamporaki C, Peitzsch M, Miehle K, Prejbisz A, Peczkowska M, et al. Biochemical diagnosis of phaeochromocytoma using plasma-free normetanephrine, metanephrine and methoxytyramine: importance of supine sampling under fasting conditions. Clin Endocrinol (Oxf) 2014;80:478-486.

25. Peitzsch M, Prejbisz A, Kroiss M, Beuschlein F, Arlt W, Januszewicz A, et al. Analysis of plasma 3-methoxytyramine, normetanephrine and metanephrine by ultraperformance liquid chromatography-tandem mass spectrometry: utility for diagnosis of dopamine-producing metastatic phaeochromocytoma. Ann Clin Biochem 2013;50:147-155.

26. Peitzsch M, Pelzel D, Glockner S, Prejbisz A, Fassnacht M, Beuschlein F, et al. Simultaneous liquid chromatography tandem mass spectrometric determination of urinary free metanephrines and catecholamines, with comparisons of free and deconjugated metabolites. Clin Chim Acta 2013;418:50-58.

**Supplemental results**

| **Supplemental table 1.** Plasma concentrations of normetanephrine, metanephrine and methoxytyramine among the restricted population of 267 patients with positive test results for any one or more metabolites | | | | | |
| --- | --- | --- | --- | --- | --- |
|  |  | PHEO | PGL | HNPGL |
|  | n | 203 | 44 | 20 |
|  | Normetanephrine - [IQ] | 3.93 [1.83-10.05] | 2.29 [1.39-6.81] | 0.64 [0.38-1.52]**† |
|  | Metanephrine - [IQ] | 1.03 [0.24-3.08] | 0.16 [0.09-0.21]** | 0.16 [0.11-0.22]** |
|  | Methoxytyramine - [IQ] | 0.08 [0.05-0.15] | 0.17 [0.05-0.76]* | 0.25 [0.08-0.67]* |
| Patients with pheochromocytomas and paragangliomas (PPGLs) are shown as three groups according to locations of tumors restricted to the adrenals (PHEO), the head and neck (HNPGL) or that primarily involve an extra-adrenal location involving the sympathetic paraganglia (PGL). Data are shown as medians and interquartiles (IQ]) * P<0.005, **P<0.0001 different from PHEO; †P<0.0001 different from PGL. | | | | |

| **Supplemental table 2.** Predictions of adrenal versus extra-adrenal locations for PPGLs, but excluding cases on incidentalomas, according to prospective expert review (A) versus retrospective application of an algorithm (B) and agreement between expert review and the algorithm (C). | | | | | |
| --- | --- | --- | --- | --- | --- |
| A |  | Actual location | | Percent correct | Percent determinable |
|  | Adrenal | Extraadrenal |
| Predicted by expert review | Adrenal | 79 | 1 | 94% [89-99] | 71% [62-79] |
| Extra-adrenal | 5 | 25 | 96% [89-100] | 49% [36-63] |
| Indeterminate | 35 | 27 | Total | Total |
| Total | 119 | 53 | 95% [91-99] | 64% [57-71] |
|  |  |  |  |  |  |
| B |  | Actual location | | Percent correct | Percent determinable |
|  | Adrenal | Extraadrenal |
| Predicted by algorithm | Adrenal | 81 | 2 | 98% [94-100] | 70% [62-78] |
| Extra-adrenal | 2 | 29 | 94% [85-100] | 59% [46-72] |
| Indeterminate | 36 | 22 | Total | Total |
| Total | 119 | 53 | 97% [93-100] | 66% [59-73] |
|  |  |  |  |  |  |
| C |  | Predicted by expert review | | | Percent agreement |
|  | Adrenal | Extraadrenal | Indeterminate |
| Predicted by algorithm | Adrenal | 78 | 0 | 5 | 98% [94-100] |
| Extra-adrenal | 0 | 27 | 4 | 90% [79-100] |
| Indeterminate | 2 | 3 | 53 | 85% [77-94] |
| Total | 80 | 30 | 62 | 92% [88-96] |
| Prospective predictions based on expert review were derived from subjective assessments of strongly increased plasma concentrations of metanephrine relative to other metabolites for predicting adrenal locations of tumors and strongly increased plasma concentrations of methoxtyramine for predicting extra-adrenal locations. Patients with neither strongly elevated metanephrine nor methoxytyramine are indicated as indeterminate and in these patients predictions about location were not made. Retrospective predictions were according to algorithms outlined in the methods section where an adrenergic phenotype indicated an adrenal location, a dopaminergic phenotype an extra-adrenal location and a noradrenergic phenotype was considered indeterminate. | | | | | |

**Supplemental figure 1.** Relationships between actual and predicted tumor diameters for pheochromocytomas (A) and paragangliomas (B) for the restricted dataset of 202 patients in who all three dimensions of tumors were recorded. Paragangliomas include those confined to the head and neck () as well as those associated with the sympathetic paraganglia (). Relationships are shown using logarithmic scales. Dashed lines indicate lines of identity. Correlation coefficients (r) are shown with 95% CI in brackets.

| **Supplemental table 3**. Predictions of mutational groups (excluding patients with an established hereditary predisposition before biochemical testing*) according to prospective expert review (A) versus retrospective use of an algorithm (B) and agreement between expert review and the algorithm (C). | | | | | |
| --- | --- | --- | --- | --- | --- |
| A |  | Actual mutation | | | Percent |
|  | RET/NF1 | VHL | SDHx | correct |
| Predicted by expert review | RET/NF1 | 42 | 0 | 0 | 93% [86-100] |
| VHL/SDHx | 3 | 12 | 22 | 100% [100-100] |
| SDHx | 0 | 1 | 17 | 94% [84-100] |
| Total | 45 | 13 | 39 | 96% [92-100] |
|  |  |  |  |  |  |
| B |  | Actual mutation | | | Percent |
|  | RET/NF1 | VHL | SDHx | correct |
| Predicted by algorithm | RET/NF1 | 43 | 0 | 0 | 96% [90-100] |
| VHL/SDHx | 2 | 13 | 21 | 100% [100-100] |
| SDHx | 0 | 0 | 18 | 100% [100-100] |
| Total | 45 | 13 | 39 | 98% [95-100] |
|  |  |  |  |  |  |
| C |  | Predicted by expert review | | | Percent agreement |
|  | RET/NF1 | VHL/SDHx | SDHx |
| Predicted by algorithm | RET/NF1 | 42 | 1 | 0 | 98% [94-100] |
| VHL/SDHx | 0 | 35 | 1 | 92% [84-100] |
| SDHx | 0 | 1 | 17 | 89% [81-100] |
| Total | 42 | 37 | 18 | 97% [94-100] |
| *Exclusion involved 28 of the 39 patients with an established hereditary predisposition; the other 11 patients, mainly with head and neck paragangliomas, did not have positive biochemical test results so that for those patients no predictions were possible. Abbreviations for mutated genes: RET, rearranged during tranfection proto-oncogene; NF1, neurofibromatosis type 1 gene; VHL, von Hippel-Lindau gene; SDHx, succinate dehydrogense subunit A, B, C and D genes. Prospective predictions based on expert review were according to strongly increased plasma concentrations of metanephrine relative to normetanephrine for predicting RET/NF1 mutations, increased normetanephrine with relatively minor or no increases in methoxytyramine or metanephrine for predicting VHL/SDHx mutations and strongly increased methoxytyramine for predicting SDHx mutations. Retrospective predictions were according to algorithms outlined in the methods section where an adrenergic phenotype indicated possible RET/NF1 mutations, a noradrenergic phenotype indicated possible VHL/SDHx mutations and a dopaminergic phenotype possible SDHx mutations. | | | | | |

**Previous editorial decisions, comments from referees and author responses**

For reasons of transparency, comments from the editors of another journal along with reviews from the referees and associated author responses are outlined as follows. In that previous decision, the editors wrote *“Especially, the authors did not address the issue of recycling already published data, with figures very similar to already published figures, conveying messages very similar to already published messages. This paper, in its current version, is not only confirmatory, but also in large part a re-publication of already published results, and can therefore not be accepted for publication.”*

The above editorial comments were not only inappropriate but also misguided and incorrect. It had also been clarified in an earlier rebuttal that the present report was quite different from earlier publications that involved data from patients enrolled into the PMT study, as also outlined in the preceding supplement. Apart from the 26 publications outlined in the supplement, there have been two other original reports relevant to the manuscript. The first was published in 2005 and outlined use of plasma metanephrines as indicators of tumor size and location [1]. The second in 2011 established how plasma free metanephrines could be used to discriminate different hereditary forms of pheochromocytoma [2].

Both the above studies were completed before initiation of the PMT study and involved different populations of patients recruited over an earlier time period. Both of those earlier studies were also completely or largely retrospective in nature compared to the present fully prospective study. Although the presented data of the present report confirm findings of the two earlier studies, the objective of the present study was distinctly different. Rather than simply describing the same relationships of biochemical phenotype to genotype and presentations of the tumors, as covered earlier, the objective of the present report was to build on this information by prospectively establishing that measurements of plasma free metanephrines can be used to predict tumor location, size and type of mutated gene. While figures 1 and 2 of the present report show similarities to some figures of the earlier reports, they involve completely different results that are neither recycled nor republished. Those similar data, as shown in figures 1 and 2 of the present report, are necessary to provide the critical background material for the distinctly different objective of the present study. Even so, there are other novel findings presented in those two figures: the first illustrates differences between paragangliomas and pheochromocytomas, which was not described in the 2005 publication [1]; while, the second includes relationships of biochemical phenotype with mutations of HRAS, which also was not covered in relevant previous work [2]. Those additional findings in the first two figures, however, are minor compared to the more significant findings of the subsequent tables and figures, which provide a high level of prospectively collected evidence predictions of tumor location, size and mutation are possible with measurements of plasma free normetanephrine, metanephrine and methoxytyramine. Of equal importance, simple algorithms are outlined that can be employed in the diagnostic process to make these predictions using a test increasingly available for diagnosis of PPGLs.

References

1. Eisenhofer G, Lenders JW, Goldstein DS, Mannelli M, Csako G, Walther MM, et al. Pheochromocytoma catecholamine phenotypes and prediction of tumor size and location by use of plasma free metanephrines. Clin Chem 2005;51:735-744.

2. Eisenhofer G, Lenders JW, Timmers H, Mannelli M, Grebe SK, Hofbauer LC, et al. Measurements of plasma methoxytyramine, normetanephrine, and metanephrine as discriminators of different hereditary forms of pheochromocytoma. Clin Chem 2011;57:411-420.

**Response to referee’s comments**

**–––––––––––––––––––––––––––––––––––––––––––––––––––––––––––––––––––––––––––**

Referee: 1

Comments to the Author

As authors note, although, it is well established in the literature that mutations causing hereditary PPGLs are distinguished by different catecholamine phenotypes, this knowledge has not been evaluated prospectively. Thus, this paper constitutes an original work which could contribute to a more accurate and earlier diagnosis as well as to a more individualised follow-up of these patients. Yet, the multicentricity of the study could affect the consistency in the measurements

**Response:**The authors thank the referee for the supportive comments and in particular the suggestion further below to consider relationships of biochemical phenotypes to multifocal disease. The multicenter nature of the study was a study requirement in order to assure sufficient recruitment of patients. A multicenter design, however, can also be useful to even out and thereby reduce recruitment bias. In fact such center-to-center differences in recruitment according to the four study entry criteria were actually documented in the supplement of the primary manuscript (PMID: 30097498). All measurements of catecholamine metabolites were, however, performed at a single center and this is clarified in the revised manuscript.

Specific points:

Abstract: Authors should correct multicentre instead of muticenter

**Response:** Both spellings are correct.The manuscript, however, is written in American rather than British english,

Methods:

Line 149: Data about the techniques of imaging used in the study are not presented adequately. It is noted that validation of predications of tumor location and size was established by CT or MRI. However, could the authors clarify if any other additional imaging was used (Ga-PET scan or DOPA-PET) for patients with multiple tumors (especially for PGLs)

**Response:** Functional imaging was largely confined to cases where there were concerns about metastatic or multifocal disease. Most commonly used functional imaging modalities were 123I-MIBG scintigraphy or PET/CT with 68Ga-DOTATATE or occasionally a related analogue. 18F-DOPA PET/CT was used at one center and only rarely. The methods section on tumor location and size now includes at lines 157-159 the following sentence “Functional imaging, mainly by 123I-MIBG scintigraphy or by 68Ga-labeled DOTATATE PET/CT, was employed to establish metastatic or multifocal disease”.

Line 128: To rephrase (verb is missing).

**Response:** A second verb “representing” has been added to the sentence (line 130).

Line 158: The percentage 85% is wrong (202/268=75%, the rests 2/268=12% and 5/268=2% are correct).

**Response:** Thank you for pointing this error out, which is now corrected (line 164).

Results:

Line 207: It is suggested that authors should rephrase to …plasma concentration or levels of normetanephrine….

**Response:** The term “concentrations” has been added after normetanephrine. The sentence has also been rewritten.

Line 234-235: It is suggested to rephrase it … (for exemple …were more scattered)

**Response:** Thank you for your attention. The sentence has been shortened and thus simplified.

General comments:

- Did the authors noted a tendency for multiple tumors according to the nor/metanephrines levels or particular imaging characteristics.

**Response: T**he reviewer has made a truly excellent point, relevant to the earlier query about functional imaging and a point that also assists in responding to the comments of the editors as well the two other referees. On subsequent analysis the biochemical characteristics did indeed relate to whether tumors were solitary in nature versus multifocal, as defined either by multiple paragangliomas, bilateral pheochromocytomas or combinations of pheochromocytomas and paragangliomas. This is relevant to considerations about interpretation of imaging results as well as choice of imaging modality, particularly additional functional imaging studies. The manuscript therefore now includes additional text in the results section (lines 204-209) and further interpretation in the discussion (lines 304-316). This important consideration was overlooked by the authors, who thank the reviewer for bringing this point to our attention.

_____________________________________________

Referee: 2

Comments to the Author

Eisenhofer et al. report a large, multi-center study that evaluated the value of measurements of plasma normetanephrine, metanephrine, and methoxytyramine to predict clinical and genetic features of pheochromocytomas and paragangliomas.

The well-performed study that took place in 8 years and was carried with scientific rigor, i.e., blinded analysis as the researchers from the center that performed the plasma measurements didn’t have the data of the features they were predicting.

There is one concern that needs to be approached. The authors should let clear to the reader the similarities and differenced between their current study and the 2005 Clinical Chemistry paper “Pheochromocytoma Catecholamine Phenotypes and Prediction of Tumor Size and Location by Use of Plasma Free Metanephrines”, also first-authored by Eisenhofer, in which they applied measurements of plasma free metanephrines to successfully predict tumor size and location.

Please refer to the approach and findings of the 2005 paper already on the Introduction and guide the reader through the novelties of the current study. This will be important as in the 2005 article the authors had shown that “all tumors in which increases in plasma metanephrine were >15% of the combined increases of normetanephrine and metanephrine either had adrenal locations or appeared to be recurrences of previously resected adrenal tumors” and that “Measurements of plasma free metanephrines predicted tumor diameter to within a mean of 30% of actual diameter…”.

**Response:** Many thanks to the reviewer for recognizing the fully prospective nature of our study in which we predicted not only the likely presence or absence of a PPGL but also tumor location, size and gene mutations according to transcriptional cluster groups. Most importantly patients were prospectively recruited into the study based on clinical suspicion of PPGLs, at which time blood and other samples were taken and shipped to the central testing laboratory where LC-MS/MS measurements of plasma free metabolites were performed. Interpretations were thereby made ahead of any other information about the presence of absence of disease and subsequently determined tumor characteristics. Investigators at the Dresden testing center were not only blinded to the diagnosis and relevant information, but that information was commonly not available to other study investigators at the time of patient recruitment and biochemical testing (exceptions include tumor characteristics in incidentalomas and genetic information when screening was carried out due to known mutations). This contrasts with almost all past studies of PPGL, including many studies carried out by the authors of the present report, which have largely been retrospective in nature. This implies that the data were already available before the study was conceived and initiated. For biochemical testing of PPGLs as well as most diagnostic studies in the wider field of endocrinology, the endocrine tests under study have been mostly those carried out in routine clinical practice and usually without a preceding study design, including a clinical protocol specifically established for purposes of diagnostic comparisons or interpretations. For the rare studies that involve newly developed tests the initial analyses are often performed on samples in which routine testing has been previously carried out, usually relying on left over samples in freezers. Whether involving routine or new tests, such studies are retrospective in nature and open to considerably more bias than a prospectively designed study with defined objectives and in which patients are recruited, measurements performed, data collected and outcomes assessed only after all critical aspects of the study are first established for implementation.

Further information about retrospective versus prospective study designs, including relative advantages and disadvantages can be found in two publications on study methodologies (PMID: 18336067; PMID: 19690438). In both reports it is clarified that prospective studies are inherently difficult, time-consuming but have the advantage of more rigorous and accurate collection of data than retrospective studies, which rely on previously collected data. Retrospective studies have the advantage of rapidity of data collection, but do not rank as highly as prospective studies in terms of strength of evidence. Prospective studies by nature can more easily take into account confounders and determine at the outset appropriate end-points.

Although the inherent difference between prospective and retrospective study designs may be clear to the referee and PMT study investigators, this differentiation in designs may not be fully appreciated by others in the field. Based on the referee’s comments, as well as those of referee 3, we therefore recognise that the initial version of the manuscript failed to clarify such differences. Therefore to address both referees’ comments we have clarified in the introduction (lines 97-99) the difference between the retrospectively collected data in the 2005 paper (PMID: 15718487) and the fully prospective nature of the present study. Furthermore, the methods section includes an additional sentence pointing the interested reader to the newly added supplement (lines 112-1145). The supplement details the background to the PMT study, outlines all currently published manuscripts that have arisen from the PMT study and includes information about differences in retrospective and prospective study designs as outlined in this response to the referee. The penultimate paragraph of the discussion, which formerly focused on limitations, now also includes emphasis on the prospective design, as a study strength, compared to past studies involving retrospective data (lines 344-345). Again in that sentence the reader is referred to the supplement.

Apart from differences in retrospective and fully prospective designs, the earlier 2005 study (PMID: 15718487) also did not include considerations of methoxytyramine, which in the present study was examined for prediction of extra-adrenal tumor location. The revised discussion (lines 301-323) also now more carefully clarifies the additional utility of measurements of methoxytyramine for pointing to extra-adrenal tumor locations as well as multifocal and metastatic disease for guiding localization studies (see also response to referee 1).

The use of plasma profile to guide Genetics is discussed but could be further emphasized.

**Response:** This was also a comment made by referee 3. The relevant paragraphs of the discussion sections have been revised and expanded to better outline the relevance to genetic testing (lines 324-343).

_____________________________________________

Referee: 3

Comments to the Author

In order for the reader to understand the contribution of this study, the authors need to clearly state what is new, since several studies on this topic have already been described.  For example, it is known that SDH mutations are mainly found outside the adrenal gland and are associated with elevated methoxytyramine levels.  Similarly, it is established that cluster two tumors present with elevated metanephrine levels.  It has also been established that elevated epinephrine and metanephrine levels are rarely associated with metastatic disease.  There have been numerous studies that describe how the biochemical phenotype can predict particular hereditary pheochromocytoma and paraganglioma (PPGL).  Similarly, numerous studies have already described the predilection of certain hereditary PPGLs to specific anatomical locations.

**Response:** As detailed further below, referee is correct that some of the presented data confirm what has been published in past studies. However, as also explained further below it is incorrect to suggest that *“there are numerous studies that describe how the biochemical phenotype can predict particular hereditary pheochromocytoma and paraganglioma (PPGL).”*

The referee first states that *“it is known that SDH mutations are mainly found outside the adrenal gland and are associated with elevated methoxytyramine levels”* and that “*it is established that cluster two tumors present with elevated metanephrine levels.* Both statements are correct. There is one single original retrospective study that establishes that SDHx mutations are associated with elevated plasma methoxytyramine concentrations (PMID: 21262951). That retrospective study was also the first to show that tumors due to either *RET* and *NF1* mutations are characterized by high proportions of tissue epinephrine and present with elevated plasma concentrations of free metanephrine that reflect the epinephrine-producing adrenergic phenotype of the tumors. The connection to cluster 2 and cluster 1 tumors was not, however, made in that report, but was made in two subsequent reports published in 2012 (PMID: 22452945) and 2014 (PMID: 24676840). Neither, however, included measurements of plasma free metabolites, though the former included measurements of urinary fractionated metanephrines and both covered tumor tissue concentrations of catecholamines and expression of phenylethanolamine-N-methyltrransferase. Both statements from the referee are, however, largely irrelevant since the stated objectives of the present study is not to define catecholamine biochemical phenotypes according to mutations, but rather to use these phenotypes for prospectively predicting tumor size, location and underlying mutation type (see Introduction, lines 94-102). Simply put the retrospective work has already been carried out, but what was missing was prospective confirmation and validation according to predictions without foreknowledge. Referee 3 is referred to the response above to referee 2 for further explanation.

There been one other relevant report on relationships of plasma free or urinary fractionated metanephrines with genotype (PMID: 29391129). That report published in 2018 involved a single index NF1 case and retrospective analysis of data from a series of 88 patients with PPGLs due to *NF1,* *RET* and *VHL* mutations. That report, like the earlier 2011 report (PMID: 21262951), was retrospective in nature and did not actually prospectively predict presence of mutated genes as was done in the present report. Thus, although there are two previous reports focusing on use of plasma free metanephrines for predicting mutated tumor susceptibility genes, these are both retrospective in nature. Furthermore, only the first report included measurements of methoxytyramine and patients with SDHx mutations. Neither reports included patients with tumors due to somatic mutations of *RET, NF1, VHL or HRAS*. The present report includes such cases thereby establishing that those mutations are also characterized by distinctive biochemical phenotypes associated with cluster 1 and cluster 2 genotypes. Most importantly the present report is fully prospective, which distinguishes it from the other two reports.

The aforementioned two reports thus do not seem to constitute the numerous reports that the referee suggests. Both, however, were appropriately cited in the original manuscript and remain appropriately cited in the revised manuscript.

Apart from the above reports there are others in which PPGL catecholamine phenotypes — as based on measurements of plasma free metabolites — have been related to, catecholamine secretory pathways (PMID: 18854424; PMID: 21051559), metastatic disease (PMID: 22036874; PMID: 26425473), age of first tumor diagnosis (PMID: 21147885) and related differences in presentation between pediatric and adult cases of PPGLs (PMID: 28324046). One of those studies (PMID: 26425473) reports plasma concentrations of methoxtyramine in controls that are 100-fold higher than reported in other studies. None of those studies are relevant to the objectives of the present report, so are rarely if at all cited. Apart from those studies there are also several review articles that include coverage of relationships of PPGL catecholamine biochemical phenotypes to the above subject areas as well as underlying mutations of tumor susceptibility genes (PMID: 17237836; PMID: 24054150 PMID: 25332315; PMID: 28332883; PMID: 29332973 PMID: 31390824). While reasonably numerous, these are all review articles and not original reports. It is therefore appreciated that these review articles may have provided the referee with an impression that there already exist numerous reports on relationships of biochemical catecholamines phenotypes with hereditary pheochromocytoma and paraganglioma. None, however, use that information to prospectively predict mutations of tumor susceptibility genes.

The referee also states that “*It has also been established that elevated epinephrine and metanephrine levels are rarely associated with metastatic disease.”* This is again irrelevant since the results of the present report do not cover relationships of catecholamine phenotypes to metastatic disease. The referee further states that *“numerous studies have already described the predilection of certain hereditary PPGLs to specific anatomical locations.”* Again this is irrelevant since the relevant focus of the present report is on use of biochemical phenotypes to predict anatomical locations, not on relationships of tumor locations with mutations of tumor susceptibility genes. As stated in the introduction (lines 100-102), the objective of the study was to establish prospectively whether measurements of plasma normetanephrine, metanephrine and methoxytyramine might be used to predict tumor size, location and underlying mutation type.

Thus, to address the referee’s initial comment, the fully prospective nature of the study is what principally distinguishes it from previous studies. Referee 3 is again referred to our response to referee 2, where we have outlined changes to better emphasize the importance and novelty of a prospective study design. Furthermore, in addition to prospective confirmation of our previously reported retrospective data, the present study also presents new data on comparisons of predictions of tumor size in PPGLs, predictions of tumor location based on plasma methoxytyramine as well as clarifying biochemical phenotypes in *HRAS*-mutated tumors and establishing that previous data involving germline mutations also extends to somatic mutations. As also outlined in our response to referee 2, the revised manuscript now includes a supplement in which differences between retrospective and prospective study designs are outlined to better clarify what is new in the present study compared to previous studies.

The authors state that 295 patients were included (245 patients were previously described). The cohort includes: 98 patients originally included based on the suspicion of having PPGL, 96 screened due to an incidentaloma, 62 with previous history of PPGL, and 39 with hereditary risk.  The total is 295. If the inclusion of patients was based on these four categories (excluding head and neck paraganglioma (HNPGL)), the number cannot be the same. It appears that the authors accrued more patients before 295 cases were selected. Comment and revise.

**Response:** The numbers are correct. Patients with head and neck paragangliomas (H&N PGLs) were recruited based on exactly the same study entry criteria as those with pheochromocytomas or other paragangliomas. Most cases of H&N PGLs were detected after routine screening due to a known germline mutation (n-18) or risk of recurrence (n=17). However, a few were recruited into the study on the basis of signs and symptoms of apparent catecholamines excess (n=4) or due to the incidental finding of a mass in the skull base during unrelated examinations (n=4). To avoid further confusion, the word “all” has been added to line 118.

How was the tumor size formula derived? Is this formula still useful when considering that most, if not all, patients have undergone CT, MRI, or both imaging studies (size measured)? The authors should list clinical scenarios where this formula would be beneficial, here catecholamines and size.

**Response: First query -** The formula for tumor size was as established previously, according to the reference (3) and as stated in line 135. **Second query** – unlike other adrenal tumors that the referee may be more familiar with, pheochromocytomas and paragangliomas are not usually first discovered by imaging, though this does vary from center to center. In the present series from the PMT study 96 of the 295 PPGLs (32%) were first identified by imaging (i.e., incidentalomas). At other centers, such as the Mayo clinic, this proportion may be higher due to the nature of referral. For those tumors that are suspected based on other criteria, as outlined earlier, biochemical testing is carried out before imaging studies. In fact the Endocrine Society guideline recommends that imaging studies should only be initiated once biochemical tests provide sufficient proof for PPGL (PMID: 24893135). Thus, the information from biochemical testing can be used to guide imaging studies according to predictions of location and size. Nevertheless, such information can also be useful for interpretation of cases involving incidentalomas, where biochemical testing follows imaging studies. The relevant paragraphs of the discussion have been revised to cover clinical scenarios where the information can be useful (lines 301-323). Those changes were also made in response to the final comment of referee 1.

A CT or MRI must be performed to determine whether the tumor is sitting in the chest, abdomen or pelvis, as a prediction formula cannot predict tumor location. Tumors located in the adrenal gland are well detected by a CT or MRI.

**Response:** Agreed. See response above.

Why was a noradrenergic phenotype not defined as an increase of normetanephrine of more than 5% (relative to the combined increase of all three metabolites)?

**Response:** Not quite, but close.If the tumor is not classified as adrenergic or dopaminergic and is characterized by an increased plasma concentration of normetanephrine, then it must be noradrenergic. A sentence to assist with this definition is now included (lines 151-153).

Patients with three missing tumor dimensions should be excluded from the study.

**Response:** Patients with three missingtumor diameters were excluded by definition from that part of the study involving prospective prediction of tumor size. This requires no explanation. Since this was not part of the study exclusion criteria, as outlined in the protocol and primary manuscript arising from the PMT study (for details the referee is now referred to the supplement), there is no justification for excluding such patients from other parts of the study.

Previous publications describe that catecholamines do not correlate well with tumor size. Comment further, as this is well acknowledged in the discussion.

**Response:** The referee’s statement is correct. The reason for this is outlined in the discussion (lines 276-283), and mainly reflects the fact that catecholamines show highly variable secretory characteristics (see PMID: 21051559), whereas metanephrines are not actively secreted by tumors and appear to simply diffuse from cells (according to concentration gradients) following intracellular metabolism dependent on continuous leakage from vesicular stores into the cytoplasm. Beyond that explanation there are additional reasons why in some studies even relationships of tumor size with plasma or urine metabolites can be poor. First, tumor size is rarely recorded correctly or consistently at pathological examination. Even in the most recent PPGL histopathology reporting guideline from the International Collaboration on Cancer Reporting (ICCR) it is only required by pathologists to report the maximal tumor diameter. Since PPGLs can vary considerably in three dimensions, this means that a 4x2x2 cm tumor, which has a volume of 8.3 cc is classified to have the same size as a 4x4x4 cm spherical tumor, which has a volume of 33.2 cc that is actually four times larger than the other tumor. This undoubtedly also contributes to some reports showing poor or little predictive value of tumor size with metastatic disease. A second reason is that there is need for normalization of highly skewed biochemical data, which is rarely appreciated by those analysing and communicating such data, but is nevertheless readily achieved by logarithmic transformation. Without data normalization or use of logarithmic scales, relationships of tumor size with plasma or urinary catecholamine metabolites can appear extremely poor.

It would be beneficial if you could answer common clinical questions. For example, based on plasma methoxytyramine levels, could you predict whether a tumor would be located in the head and neck versus extra-adrenal (excluding head and neck)? Based on plasma normetanephrine levels, could you predict whether a tumor would be located in the adrenal gland versus extra-adrenal. Furthermore, predictions of specific mutations such as SDHx, FH and MDH would be useful. This study must add more clinical relevance and outline how to use this data alongside current NGS, MS-SPECT, and pheochromocytoma gene panels. These authors are leaders in metabologenomics and this topic should be included in this article.

**Response: First query –** The referee has raised an excellent question. Indeed it seems it might be possible to achieve some additional discrimination of head and neck paragangliomas (HNPGLs) from other extra-adrenal paragangliomas (PGLs) using the combination of both plasma free methoxytyramine concentrations and the relative tumor derived increases in methoxytyramine compared to all metabolites. Compared to pheochromocytomas, both types of tumors show increases in plasma methoxytyramine. However, for HNPGLs this is only clear after exclusion of cases that are either non-functional or too small to produce a diagnostic signal (see lines 197-199). In these cases, increases in methoxytyramine in HNPGLs, relative to all metabolites, are larger than for other paragangliomas. Again these differences are only relevant for HNPGLs that actually show increased plasma concentrations of methoxytyramine, these representing close to half of all HNPGLs in our study population. The current study did not allow for such prospective predictions. Further exploration will require retrospective analysis that can benefit from an expanded population of patients with HNPGLs.

**Second query –** It is not possible from measurements of plasma normetanephrine alone or findings of a noradrenergic phenotype to indicate adrenal versus extra-adrenal locations. This is outlined in the discussion of the manuscript (see lines 292-293). **Third query –**currently there is insufficient patient data to determine catecholamine biochemical phenotypes of tumors with FH and MDH mutations — which are extremely rare — and from this establish whether it is possible to discriminate tumors with those mutations. However, this seems unlikely, but as recently reported may be achieved by tumor metabolite profiling (PMID:30050099).

**Third comment –** the revised discussion section has been enlarged (lines 324-343) to better cover relevance of catecholamine biochemical phenotypes to genetic testing, as also suggested by referee 2.

We thank the referee for the helpful comments that should not only clarify differences from past studies but also clinical relevance.

Referee 3 provided further subsequent off-target comments below, for which no response was necessary nor appropriate.

Comments to the Author

The authors need to clearly state the most clinically-relevant take-away from their large prospective study, and how this compares and adds something new to previous publications. The authors must mention the limitations of multicenter studies (such as enrolment, follow-up and data collection issues). The authors manipulate their responses to futher justify their study, however, there are still problems that need to be addressed.

My previous comment about tumor size and volume needs to be further addressed. The authors state that they have “mean tumor volume…” for only 202 specimens. In a well-conducted prospective study, the inability to provide three dimensions in 13 patients is alarming and raises the question if all data was collected prospectively. The large amount of missing data is worrisome. There were an additional 16 patients who had extensive metastatic disease that precluded reliable determination of tumor dimensions. The authors should understand that patients with extensive metastatic disease cannot be included in this calculation (and perhaps they were not). Altogether, about 10% of patients had missing values. The authors should comment on their definition of “extensive,” since this can mean relatively few (but still multiple) to numerous small or large tumors. The outcomes of cancer patients, especially in the latter two groups, are often very different. The authors need to explain in detail what they mean by “missing dimensions were assumed to match to the average of those recorded.” They should include an example of this to ensure reader understanding. The authors should explain how patients with metastatic tumors were included or not included. Similarly, please explain why CT/MRI measurements were not used. The legend in Table 2 is unclear: please indicate which patients were included in the calculation of tumor size (based on your statement regarding metastatic disease, missing tumor dimensions, etc.). It is concerning that a reviewer (who has some knowledge in this area) is confused about this study, and this most certainly means that the reader will be confused as well.

Predicting tumor size using biochemical results is interesting, however, it is much less relevant in current clinical practice since almost all patients undergo either a CT or MRI. From these imaging studies, dimensions can be measured very accurately (with exceptions in certain locations, such as bones).

When discussing negative biochemical results in Table 1, why does the author describe large non-functional tumors as greater than 2 cm? Where is this cutoff from? The authors previously described biochemical analysis of much smaller tumors that are now being concluded as non-functional.

Table 1 has age of study entry (SE) and age of first diagnosis (FD). If SE is when patients first entered into the protocol, then FD was made in 132 patients before they entered the protocol. This is a much higher number than the 62 patients with previously described history of pheochromocytoma and paraganglioma. If FD is defined as age of first diagnosis, then what does “FD” represent?

If an increase in methoxytyramine is 6% (relative to the combined increases of all metabolites) and an increase in normetaphrine is 94% (relative to the combined increases of all metabolites), then the tumor has a dopaminergic phenotype. This conclusion could be confusing to physicians and could potentially lead to incorrect treatment since patients with a “dopaminergic phenotype” likely still have norepinephrine release. If this reasoning is correct based on your definitions of phenotypes, then it is not clinically useful (except perhaps in predicting specific genotypes).

The statement in lines 317-323 should be reconsidered, since even large tumors can have low catecholamine and/or metanephrine secretion due to necrosis, undifferentiated or composite tumors. The authors could mention the scenarios in which calculating tumor volume would be important (for example, when patients are treated with radiotherapy), however, no physicians will currently measure the volume of each metastatic lesion.

The new paragraphs related to biochemical phenotypes and genetic testing is of interest but complicated in clinical practice. A biochemical phenotype together with metabolomics (especially when routinely performed in the future) might secure a better understanding of what is or is not a pathogenic mutation.
